# Supplementary material
Source: PubMed Central journal article supplement (PMC3876237)
Supplement: 1307595111_pnas.201307595SI.pdf [file 1307595111_pnas.201307595SI.pdf]

# Supporting Information

Jin and Wang 10.1073/pnas.1307595111

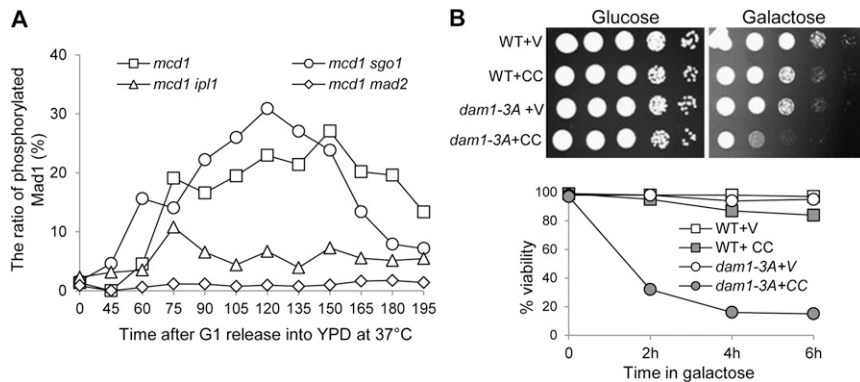

**Fig. S1.** (A) The relative level of phosphorylated mitotic arrest-deficient 1 (Mad1) based on the Western blotting result in Fig. 1B. ImageJ program was used to quantify the percentage of phosphorylated Mad1 based on the Western blotting result in Fig. 1B. (B) *dam1-3A* (Duo1 and Mps1 interacting) mutant cells lose viability after *CIK1-CC* (the coiled-coil domain of *CIK1* gene) overexpression. Serial 10-fold dilutions of WT and *dam1-3A* cells with a vector (V) or a *P<sub>GAL</sub>CIK1-CC* (CC) plasmid were plated onto glucose and galactose plates and incubated at 25 °C for 3 d. G<sub>1</sub>-arrested cells with the indicated genotypes were released into galactose medium at 25 °C. Cells were collected at 0, 2, 4, and 6 h and spread onto yeast peptone dextrose (YPD) plates to count the plating efficiency after overnight growth ( $n > 300$ ).

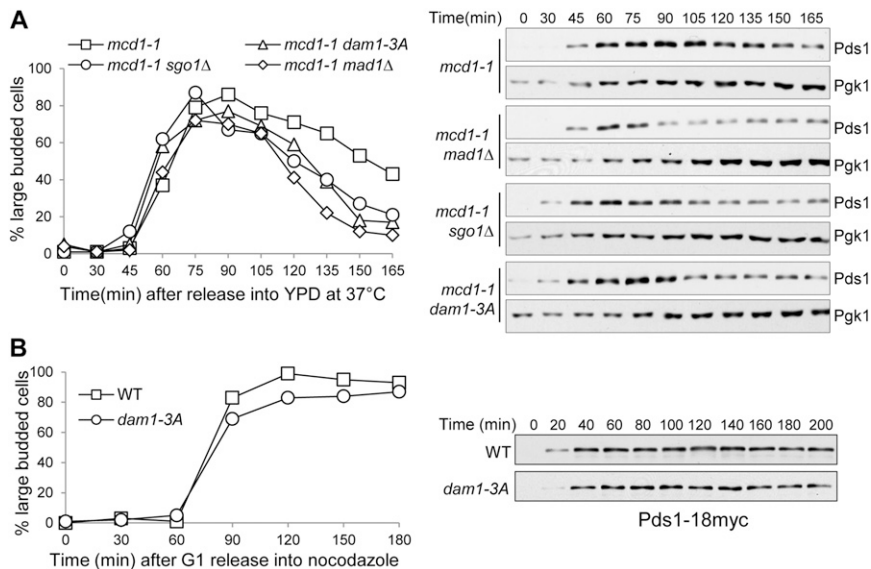

**Fig. S2.** *dam1-3A* mutant cells enter anaphase prematurely in the absence of tension. (A) *dam1-3A* mutation alleviates the delay of precocious dissociation of sisters 1 (Pds1) degradation in *mitotic chromosome determinant 1-1* (*mcd1-1*) mutants. *PDS1-18myc* (*c-Myc*) cells with the indicated genotypes were synchronized in G<sub>1</sub> phase at 25 °C, and then released into 37 °C YPD medium. Cell lysates were prepared every 15 min to determine the protein level of Pds1. Here we also show phosphoglycerate kinase 1 (Pgk1) protein levels as a loading control. (B) *dam1-3A* mutant cells show efficient cell cycle arrest in response to nocodazole treatment. G<sub>1</sub>-arrested *PDS1-18myc* and *dam1-3A PDS1-18myc* cells were released into medium containing 20 μg/mL of nocodazole and incubated at 30 °C. Pds1 protein levels were determined after Western blotting. The budding index is shown on the Left, and Pds1 levels are shown on the Right.



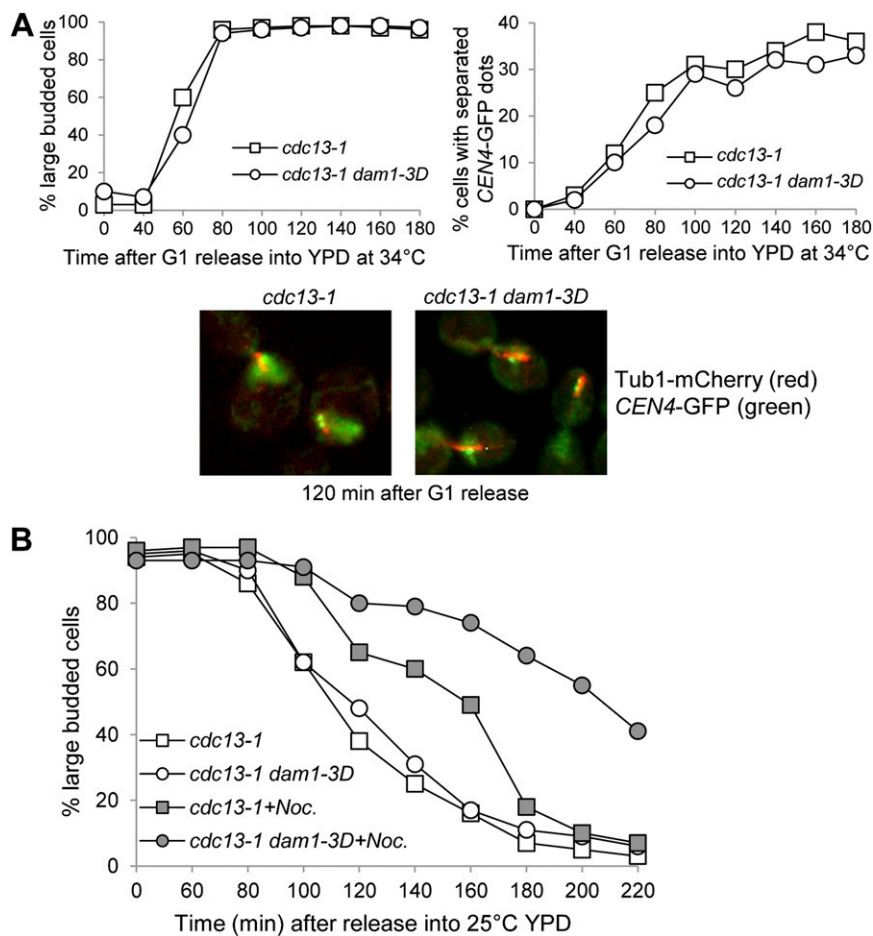

**Fig. S5.** *dam1-3D* mutants show spindle assembly checkpoint silencing defect. (A) *dam1-3D* mutant cells show normal kinetics of sister centromere separation. *Cell division cycle 13-1* (*cdc13-1*) and *cdc13-1 dam1-3D* cells with *TUB1-mCherry CEN4-GFP* were synchronized in G<sub>1</sub> phase and then released into the cell cycle at 34 °C, the restrictive temperature for *cdc13-1*. Cells were collected every 20 min to examine the spindle morphology (Tub1-mCherry, red) and separation of centromere on chromosome IV (*CEN4-GFP*, green). The appearance of two GFP dots indicates bipolar attachment that applies tension and separates sister centromeres. The budding index and the percentage of cells with two GFP dots are shown in the *Upper* panels. Some representative images for cells at 120 min are shown in the *Lower* panel. (B) The kinetics of anaphase onset in *dam1-3D* cells after nocodazole treatment. G<sub>1</sub>-arrested *cdc13-1* and *cdc13-1 dam1-3D* cells were released into 32 °C YPD medium with or without 20 μg/mL nocodazole (Noc) for 2 h. After nocodazole washout, the cells were released into 25 °C YPD medium. α-factor was added back to block the second round of cell cycle. The percentage of large-budded cells was counted over time (*n* > 100).



Table S1. Strains used in this study

| Strains   | Relevant genotypes                                                                                                   | Reference                                                      |
|-----------|----------------------------------------------------------------------------------------------------------------------|----------------------------------------------------------------|
| Y300      | <i>MATa ura3-1 his3-11,15 leu2-3,112 trp1-1 ade2-1 can1-100</i>                                                      | Lab stock                                                      |
| 2781-9-1  | <i>MATa mcd1-1 trp1::Sphis5<sup>+</sup> MAD1-HA3-URA3</i>                                                            | This study                                                     |
| 2730-1-3  | <i>MATa mcd1-1 trp1::Sphis5<sup>+</sup> ip11-321 MAD1-HA3-URA3</i>                                                   | This study                                                     |
| 2731-3-1  | <i>MATa mcd1-1 trp1::Sphis5<sup>+</sup> sgo1Δ::KanMX MAD1-HA3-URA3</i>                                               | This study                                                     |
| 2781-5-1  | <i>MATa mcd1-1 trp1::Sphis5<sup>+</sup> mad2Δ::LEU2 MAD1-HA3-URA3</i>                                                | This study                                                     |
| 2719-3-4  | <i>MATa MAD1-HA3-URA3</i>                                                                                            | This study                                                     |
| 2723-4-4  | <i>MATa sgo1Δ::KanMX MAD1-HA3-URA3</i>                                                                               | This study                                                     |
| 2722-2-2  | <i>MATa ip11-321 MAD1-HA3-URA3</i>                                                                                   | This study                                                     |
| YYW141    | <i>MATa promURA3::tetR::GFP-LEU2 CENIV::tetOX448::URA3 TUB1-mCherry::URA3</i>                                        | Lab stock                                                      |
| 2320-2-4  | <i>MATa dam1(S257A S265A S292A)::KanMX promURA3::tetR::GFP-LEU2 CENIV::tetOX448::URA3 TUB1-mCherry::URA3</i>         | This study                                                     |
| 2425-11-3 | <i>MATa mcd1-1 PDS1-18myc::LEU2</i>                                                                                  | This study                                                     |
| 2450-1-1  | <i>MATa mcd1-1 mad1Δ::HIS3 PDS1-18myc::LEU2</i>                                                                      | This study                                                     |
| 2436-3-3  | <i>MATa mcd1-1 sgo1Δ::KanMX PDS1-18myc::LEU2</i>                                                                     | This study                                                     |
| 2425-6-4  | <i>MATa mcd1-1 dam1(S257A S265A S292A)::KanMX PDS1-18myc::LEU2</i>                                                   | This study                                                     |
| 300-1-1   | <i>MATa PDS1-18myc::LEU2</i>                                                                                         | Lab stock                                                      |
| 2376-9-3  | <i>MATa dam1(S257A S265A S292A) -KanMX PDS1-18myc::LEU2</i>                                                          | This study                                                     |
| 2718-7-2  | <i>MATa dam1(S257A S265A S292A)::KanMX MAD1-HA3-URA3</i>                                                             | This study                                                     |
| 2782-2-2  | <i>MATa mcd1-1 trp1::Sphis5<sup>+</sup> dam1(S257A S265A S292A)::KanMX MAD1-HA3-URA3</i>                             | This study                                                     |
| 2862-9-4  | <i>MATa mcd1-1 trp1::Sphis5<sup>+</sup> BUB1-13myc::Sphis5<sup>+</sup></i>                                           | This study                                                     |
| 2862-4-4  | <i>MATa mcd1-1 trp1::Sphis5<sup>+</sup> dam1(S257A S265A S292A)::KanMX BUB1-13myc::Sphis5<sup>+</sup></i>            | This study                                                     |
| DDY2496   | <i>MATa his3Δ200 leu2-3,112 ura3-52 dam1(S257D S265D S292D)::KanMX</i>                                               | Georjana Barnes<br>(University of California,<br>Berkeley, CA) |
| 2769-1-2  | <i>MATa dam1(S257D S265D S292D)::KanMX MAD1-HA3-URA3</i>                                                             | This study                                                     |
| 2859-1-4  | <i>MATa dam1(S257D S265D S292D)::KanMX BUB1-13myc::Sphis5<sup>+</sup></i>                                            | This study                                                     |
| 771-4-1   | <i>MATa mad1Δ::HIS3-PDS1-18myc::LEU2</i>                                                                             | This study                                                     |
| 2848-8-3  | <i>MATa dam1(S257D S265D S292D)::KanMX PDS1-18myc::LEU2</i>                                                          | This study                                                     |
| 2848-2-2  | <i>MATa mad1Δ::HIS3 dam1(S257D S265D S292D)::KanMX PDS1-18myc::LEU2</i>                                              | This study                                                     |
| 2686-1-2  | <i>MATa mad2Δ::URA3 PDS1-18myc::LEU2</i>                                                                             | This study                                                     |
| 2686-4-1  | <i>MATa mad2Δ::URA3 dam1(S257D S265D S292D)::KanMX PDS1-18myc::LEU2</i>                                              | This study                                                     |
| 2849-2-2  | <i>MATa ip11-321 dam1(S257A S265A S292A)::KanMX MAD1-HA3-URA3</i>                                                    | This study                                                     |
| 2880-14-1 | <i>MATa mcd1-1 trp1::Sphis5<sup>+</sup> PDS1-18myc::LEU2</i>                                                         | This study                                                     |
| 2880-3-1  | <i>MATa mcd1-1 trp1::Sphis5<sup>+</sup> dam1(S257D S265D S292D)::KanMX-PDS1-18myc::LEU2</i>                          | This study                                                     |
| 2880-2-3  | <i>MATa mcd1-1 trp1::Sphis5<sup>+</sup> ip11-321 PDS1-18myc::LEU2</i>                                                | This study                                                     |
| 2880-9-2  | <i>MATa mcd1-1 trp1::Sphis5<sup>+</sup> ip11-321 dam1(S257D S265D S292D)::KanMX PDS1-18myc::LEU2</i>                 | This study                                                     |
| 1091-5-3  | <i>MATa cdc13-1 promURA3::tetR::GFP-LEU2 CENIV::tetOX448::URA3 TUB1-mCherry::URA3</i>                                | Lab stock                                                      |
| 2419-1-1  | <i>MATa cdc13-1 dam1(S257D S265D S292D)::KanMX promURA3::tetR::GFP-LEU2 CENIV::tetOX448::URA3 TUB1-mCherry::URA3</i> | This study                                                     |
| 2902-3-2  | <i>MATa DAM1-3HA:: Sphis5<sup>+</sup></i>                                                                            | This study                                                     |
| 2902-1-1  | <i>MATa sgo1Δ::KanMX DAM1-3HA:: Sphis5<sup>+</sup></i>                                                               | This study                                                     |
| 683-15-3  | <i>MATa MTW1-3GFP::HIS3</i>                                                                                          | Lab stock                                                      |
| 2975-2-1  | <i>MATa dam1(S257D S265D S292D)::KanMX MTW1-3GFP::HIS3</i>                                                           | This study                                                     |
| 2971-3-3  | <i>MATa dam1(S257D S265D S292D)::KanMX mad1Δ::HIS3 MTW1-3GFP::HIS3</i>                                               | This study                                                     |
| 2973-3-2  | <i>MATα CFIII(URA3,sup11)</i>                                                                                        | This study                                                     |
| 2973-12-3 | <i>MATa dam1(S257D S265D S292D)::KanMX CFIII(URA3,sup11)</i>                                                         | This study                                                     |
| 2973-2-3  | <i>MATa mad2Δ::LEU2 CFIII(URA3,sup11)</i>                                                                            | This study                                                     |
| 2973-4-1  | <i>MATa dam1(S257D S265D S292D)::KanMX mad2Δ::LEU2CFIII(URA3,sup11)</i>                                              | This study                                                     |
| 2851-4-2  | <i>MATa sgo1Δ::TRP1 PDS1-18myc::LEU2</i>                                                                             | This study                                                     |
| 2851-3-3  | <i>MATa sgo1Δ::TRP1 dam1(S257D S265D S292D)::KanMX PDS1-18myc::LEU2</i>                                              | This study                                                     |

*Ade*, adenine requiring; *can*, canavanine resistance; *CENIV*, centromere on chromosome IV; *ipl*, increase in ploidy; *KanMX*, kanamycin resistance; *MATa*, mating type a; *prom*, promoter; *Sphis*, histidine gene from *S. pombe*; *sup*, suppressor; *tetO*, tetracyclin operator; *trp*, tryptophan requiring; *ura*, uracil requiring.
